# Supplementary material for: Long-Term Ringing Data on Migrating Passerines Reveal Overall Avian Decline in Europe
Source: MDPI journal article supplement (doi:10.3390/d14110905), 2022-10-26
Supplement: s1 [file s1]

## Supplementary Materials

**Table S1.** Average number of annually ringed birds with standard deviation (SD), coefficients of variation, maximal number of locations and number of ringing years. Below the table are listed species that were ringed during autumn migration during the study period (2000–2016), but were due to low presence not included in modelling analyses.

| Scientific name                      | Average no. of annually ringed birds $\pm$ SD | Coefficient of variation among no. of ringed birds (%) | Coefficient of variation among no of ringed birds (%) after 3-yr. moving average | Coefficient of variation among no. of locations (%) | Max. no. of locations | No. of ringing years during 2000-2016 |
|--------------------------------------|-----------------------------------------------|--------------------------------------------------------|----------------------------------------------------------------------------------|-----------------------------------------------------|-----------------------|---------------------------------------|
| <i>Acrocephalus arundinaceus</i>     | 307.9 $\pm$ 72.3                              | 23.5                                                   | -                                                                                | 13.4                                                | 28                    | 17                                    |
| <i>Acrocephalus melanopogon</i>      | 23.4 $\pm$ 20.3                               | 86.6                                                   | -                                                                                | 43.2                                                | 13                    | 17                                    |
| <i>Acrocephalus palustris</i>        | 1258.4 $\pm$ 430.6                            | 34.2                                                   | -                                                                                | 22.2                                                | 45                    | 17                                    |
| <i>Acrocephalus schoenobaenus</i>    | 2827.6 $\pm$ 910.1                            | 32.2                                                   | 17.1                                                                             | 17.5                                                | 45                    | 17                                    |
| <i>Acrocephalus scirpaceus</i>       | 3386.5 $\pm$ 934.4                            | 27.6                                                   | -                                                                                | 18.6                                                | 49                    | 17                                    |
| <i>Aegithalos caudatus</i>           | 270.17 $\pm$ 96.6                             | 35.8                                                   | 21.5                                                                             | 24.8                                                | 45                    | 17                                    |
| <i>Anthus trivialis</i>              | 80.7 $\pm$ 34.9                               | 43.3                                                   | 21.8                                                                             | 18.4                                                | 27                    | 17                                    |
| <i>Carduelis carduelis</i>           | 249.7 $\pm$ 115.8                             | 46.4                                                   | -                                                                                | 28.2                                                | 39                    | 17                                    |
| <i>Certhia brachydactyla</i>         | 10.1 $\pm$ 5.7                                | 56.5                                                   | -                                                                                | 50.8                                                | 12                    | 17                                    |
| <i>Certhia familiaris</i>            | 18.2 $\pm$ 8.5                                | 47.0                                                   | 25.7                                                                             | 43.2                                                | 25                    | 17                                    |
| <i>Cettia cetti</i>                  | 21.2 $\pm$ 10.0                               | 47.3                                                   | -                                                                                | 55.3                                                | 15                    | 17                                    |
| <i>Chloris chloris</i>               | 487.4 $\pm$ 243.0                             | 49.9                                                   | 19.3                                                                             | 36.9                                                | 56                    | 17                                    |
| <i>Coccothraustes coccothraustes</i> | 48.2 $\pm$ 21.                                | 45.4                                                   | -                                                                                | 60.0                                                | 37                    | 17                                    |
| <i>Curruca communis</i>              | 410.4 $\pm$ 138.7                             | 33.8                                                   | -                                                                                | 18.0                                                | 45                    | 17                                    |
| <i>Curruca curruca</i>               | 240.5 $\pm$ 55.0                              | 22.9                                                   | -                                                                                | 13.1                                                | 38                    | 17                                    |
| <i>Curruca nisoria</i>               | 20.4 $\pm$ 8.4                                | 41.4                                                   | -                                                                                | 31.1                                                | 13                    | 17                                    |
| <i>Cyanecula svecica</i>             | 38.3 $\pm$ 14.6                               | 38.1                                                   | -                                                                                | 39.3                                                | 23                    | 17                                    |
| <i>Cyanistes caeruleus</i>           | 980.8 $\pm$ 385.9                             | 39.3                                                   | 24.4                                                                             | 19.3                                                | 77                    | 17                                    |
| <i>Delichon urbicum</i>              | 18.5 $\pm$ 36.8                               | 198.3                                                  | 115.6                                                                            | 45.8                                                | 4                     | 16                                    |
| <i>Emberiza cia</i>                  | 16.1 $\pm$ 10.4                               | 65.1                                                   | -                                                                                | 76.3                                                | 10                    | 16                                    |
| <i>Emberiza cirrus</i>               | 12.1 $\pm$ 11.5                               | 94.8                                                   | 50.3                                                                             | 64.1                                                | 11                    | 17                                    |
| <i>Emberiza citrinella</i>           | 85.5 $\pm$ 29.2                               | 34.2                                                   | 14.4                                                                             | 27.8                                                | 31                    | 17                                    |
| <i>Emberiza schoeniclus</i>          | 602.5 $\pm$ 285.7                             | 47.4                                                   | -                                                                                | 26.9                                                | 28                    | 17                                    |
| <i>Erithacus rubecula</i>            | 4103.5 $\pm$ 1382.3                           | 33.7                                                   | 17.4                                                                             | 22.3                                                | 90                    | 17                                    |
| <i>Ficedula hypoleuca</i>            | 97.7 $\pm$ 43.8                               | 44.9                                                   | -                                                                                | 21.0                                                | 25                    | 17                                    |
| <i>Fringilla coelebs</i>             | 404.6 $\pm$ 159.2                             | 39.3                                                   | -                                                                                | 25.8                                                | 54                    | 17                                    |
| <i>Fringilla montifringilla</i>      | 96.8 $\pm$ 87.7                               | 90.6                                                   | 34.1                                                                             | 59.4                                                | 28                    | 16                                    |
| <i>Garrulus glandarius</i>           | 11.4 $\pm$ 5.8                                | 50.8                                                   | 27.5                                                                             | 41.0                                                | 14                    | 17                                    |
| <i>Hippolais icterina</i>            | 308.2 $\pm$ 168.1                             | 54.6                                                   | -                                                                                | 18.4                                                | 35                    | 17                                    |
| <i>Hippolais polyglotta</i>          | 7.4 $\pm$ 3.9                                 | 53.4                                                   | -                                                                                | 40.8                                                | 5                     | 17                                    |
| <i>Hirundo rustica</i>               | 7634.1 $\pm$ 5985.2                           | 78.4                                                   | -                                                                                | 28.5                                                | 31                    | 17                                    |
| <i>Lanius collurio</i>               | 163.6 $\pm$ 66.0                              | 40.4                                                   | -                                                                                | 18.7                                                | 35                    | 17                                    |
| <i>Linaria cannabina</i>             | 33.2 $\pm$ 22.1                               | 66.5                                                   | -                                                                                | 68.2                                                | 25                    | 17                                    |
| <i>Locustella fluviatilis</i>        | 15.0 $\pm$ 8.5                                | 56.6                                                   | -                                                                                | 44.1                                                | 13                    | 17                                    |
| <i>Locustella luscinioides</i>       | 35.4 $\pm$ 14.2                               | 40.4                                                   | -                                                                                | 29.5                                                | 17                    | 17                                    |
| <i>Locustella naevia</i>             | 137.0 $\pm$ 61.7                              | 45.1                                                   | -                                                                                | 18.8                                                | 28                    | 17                                    |
| <i>Lophophanes cristatus</i>         | 50.2 $\pm$ 23.6                               | 47.0                                                   | 29.8                                                                             | 39.3                                                | 37                    | 17                                    |
| <i>Loxia curvirostra</i>             | 9.7 $\pm$ 11.6                                | 119.8                                                  | 65.0                                                                             | 91.6                                                | 9                     | 14                                    |
| <i>Luscinia luscinia</i>             | 23.0 $\pm$ 8.3                                | 36.3                                                   | -                                                                                | 35.1                                                | 18                    | 17                                    |
| <i>Luscinia megarhynchos</i>         | 153.8 $\pm$ 34.4                              | 22.4                                                   | -                                                                                | 18.0                                                | 32                    | 17                                    |
| <i>Motacilla alba</i>                | 15.7 $\pm$ 19.4                               | 124.0                                                  | -                                                                                | 35.7                                                | 7                     | 17                                    |

|                                |                  |       |      |      |    |    |
|--------------------------------|------------------|-------|------|------|----|----|
| <i>Motacilla cinerea</i>       | 6.1 ± 3.8        | 62.9  | -    | 57.3 | 8  | 17 |
| <i>Motacilla flava</i>         | 36.2 ± 39.0      | 107.7 | -    | 56.4 | 9  | 17 |
| <i>Muscicapa striata</i>       | 65.8 ± 24.5      | 37.3  | -    | 18.8 | 20 | 17 |
| <i>Oriolus oriolus</i>         | 6.2 ± 3.6        | 58.1  | 33.6 | 45.0 | 8  | 17 |
| <i>Parus major</i>             | 1708.1 ± 897.5   | 52.5  | 17.3 | 21.8 | 94 | 17 |
| <i>Passer domesticus</i>       | 205.4 ± 107.0    | 52.1  | 25.8 | 48.3 | 39 | 17 |
| <i>Passer italiae</i>          | 9.8 ± 20.3       | 206.0 | 90.0 | 91.5 | 7  | 12 |
| <i>Passer montanus</i>         | 998.4 ± 396.3    | 39.7  | -    | 26.9 | 56 | 17 |
| <i>Periparus ater</i>          | 854.0 ± 685.5    | 80.3  | 37.2 | 37.3 | 53 | 17 |
| <i>Phoenicurus ochruros</i>    | 29.0 ± 14.6      | 50.5  | 25.9 | 40.8 | 26 | 17 |
| <i>Phoenicurus phoenicurus</i> | 49.4 ± 22.7      | 46.0  | 29.4 | 21.3 | 25 | 17 |
| <i>Phylloscopus collybita</i>  | 1714.9 ± 366.3   | 21.4  | -    | 18.2 | 61 | 17 |
| <i>Phylloscopus sibilatrix</i> | 440.8 ± 245.6    | 55.7  | -    | 18.3 | 31 | 17 |
| <i>Phylloscopus trochilus</i>  | 227.8 ± 98.3     | 43.2  | 20.1 | 15.3 | 39 | 17 |
| <i>Poecile montanus</i>        | 37.7 ± 19.7      | 52.3  | 35.7 | 40.5 | 28 | 16 |
| <i>Poecile palustris</i>       | 101.2 ± 52.3     | 51.7  | 15.3 | 30.1 | 43 | 17 |
| <i>Prunella modularis</i>      | 4898.8 ± 1896.5  | 38.7  | 14.8 | 21.5 | 56 | 17 |
| <i>Pyrrhula pyrrhula</i>       | 19.1 ± 16.2      | 84.9  | 25.3 | 57.0 | 15 | 15 |
| <i>Regulus ignicapilla</i>     | 30.7 ± 11.1      | 36.4  | -    | 43.6 | 32 | 17 |
| <i>Regulus regulus</i>         | 1565.2 ± 1089.6  | 69.6  | 37.0 | 32.9 | 61 | 17 |
| <i>Remiz pendulinus</i>        | 227.2 ± 190.5    | 83.8  | 46.7 | 44.3 | 20 | 17 |
| <i>Riparia riparia</i>         | 83.3 ± 82.4      | 98.9  | -    | 46.7 | 12 | 16 |
| <i>Saxicola rubetra</i>        | 38.8 ± 11.1      | 28.7  | -    | 26.8 | 18 | 17 |
| <i>Saxicola rubicola</i>       | 34.4 ± 17.4      | 50.8  | -    | 35.0 | 22 | 17 |
| <i>Serinus serinus</i>         | 85.7 ± 40.7      | 47.6  | -    | 41.0 | 35 | 17 |
| <i>Sitta europaea</i>          | 23.4 ± 17.1      | 73.2  | 28.1 | 55.1 | 27 | 17 |
| <i>Spinus spinus</i>           | 939.0 ± 1423.4   | 151.6 | 69.3 | 56.7 | 43 | 17 |
| <i>Sturnus vulgaris</i>        | 133.4 ± 72.1     | 54.1  | -    | 23.8 | 19 | 17 |
| <i>Sylvia atricapilla</i>      | 18625.4 ± 5534.1 | 29.7  | -    | 16.2 | 68 | 17 |
| <i>Sylvia borin</i>            | 6481.6 ± 2132.7  | 32.9  | -    | 15.3 | 52 | 17 |
| <i>Troglodytes troglodytes</i> | 95.6 ± 31.4      | 32.9  | -    | 26.2 | 38 | 17 |
| <i>Turdus merula</i>           | 575.8 ± 135.1    | 23.5  | -    | 17.5 | 49 | 17 |
| <i>Turdus philomelos</i>       | 257.1 ± 64.0     | 24.9  | -    | 15.5 | 39 | 17 |

Rarely ringed passerine species: Paddyfield Warbler (*Acrocephalus agricola*), Blyth's Reed Warbler (*Acrocephalus dumetorum*), Eurasian Skylark (*Alauda arvensis*), Tawny Pipit (*Anthus campestris*), Meadow Pipit (*Anthus pratensis*), Water Pipit (*Anthus spinoletta*), Bohemian Waxwing (*Bombycilla garrulus*), Siberian Rubythroat (*Calliope calliope*), Citril Finch (*Carduelis citrinella*), Common Rosefinch (*Carpodacus erythrurus*), Red-rumped Swallow (*Cecropis daurica*), White-throated Dipper (*Cinclus cinclus*), Zitting Cisticola (*Cisticola juncidis*), Common Raven (*Corvus corax*), Carrion Crow (*Corvus cornix*), Subalpine Warbler (*Curruca cantillans*), Sardinian Warbler (*Curruca melanocephala*), Corn Bunting (*Emberiza calandra*), Ortolan Bunting (*Emberiza hortulana*), Pine Bunting (*Emberiza leucocephalos*), Black-headed Bunting (*Emberiza melanocephala*), Little Bunting (*Emberiza pusilla*), Rustic Bunting (*Emberiza rustica*), Collared Flycatcher (*Ficedula albicollis*), Red-breasted Flycatcher (*Ficedula parva*), Booted Warbler (*Hippolais caligata*), Olivaceous Warbler (*Iduna pallida*), Great Gray Shrike (*Lanius excubitor*), Lesser Grey Shrike (*Lanius minor*), Woodchat Shrike (*Lanius senator*), Parrot Crossbill (*Loxia pytyopsittacus*), Woodlark (*Lullula arborea*), Northern Nutcracker (*Nucifraga caryocatactes*), Northern Wheatear (*Oenanthe oenanthe*), Bearded Reedling (*Panurus biarmicus*), Spanish Sparrow (*Passer hispaniolensis*), Dusky Warbler (*Phylloscopus fuscatus*), Western Bonelli's Warbler (*Phylloscopus bonelli*), Yellow-browed Warbler (*Phylloscopus inornatus*), Eurasian Magpie (*Pica pica*), Snow Bunting (*Plectrophenax nivalis*), Eurasian Crag Martin (*Ptyonoprogne rupestris*), Yellow-billed Cough (*Pyrrhocorax graculus*), Orange-flanked Bush-robin (*Tarsiger cyanurus*), Redwing (*Turdus iliacus*), Fieldfare (*Turdus pilaris*), Ring Ouzel (*Turdus torquatus*), Mistle Thrush (*Turdus viscivorus*)

**Table S2.** All species for modelling and their ecological and life-history traits. See abbreviations for traits in Table 1.

| Id | Species                              | Species abbreviation | Habitat | Diet  | Migratory status in Europe | Migration distance | Breeding status in Slovenia | Breeding distribution range in Europe | Productivity [average no. eggs per pair per year] |
|----|--------------------------------------|----------------------|---------|-------|----------------------------|--------------------|-----------------------------|---------------------------------------|---------------------------------------------------|
| 1  | <i>Acrocephalus arundinaceus</i>     | ACRARU               | WET     | INVER | PAS                        | LM                 | RB                          | CBE                                   | 6.8                                               |
| 2  | <i>Acrocephalus melanopogon</i>      | ACRMEL               | WET     | INVER | PAS                        | SM                 | OB                          | SBE                                   | 6.8                                               |
| 3  | <i>Acrocephalus palustris</i>        | ACRPAL               | WET     | INVER | PAS                        | LM                 | RB                          | CBE                                   | 6.8                                               |
| 4  | <i>Acrocephalus schoenobaenus</i>    | ACRSCH               | WET     | INVER | PAS                        | LM                 | RB                          | CBE                                   | 8.3                                               |
| 5  | <i>Acrocephalus scirpaceus</i>       | ACRSCI               | WET     | INVER | PAS                        | LM                 | RB                          | CBE                                   | 6                                                 |
| 6  | <i>Aegithalos caudatus</i>           | AEGCAU               | FOR     | INVER | RES                        | NM                 | RB                          | CBE                                   | 15                                                |
| 7  | <i>Anthus trivialis</i>              | ANTTRI               | CL      | INVER | PAS                        | LM                 | RB                          | CBE                                   | 10                                                |
| 8  | <i>Carduelis carduelis</i>           | CARCAR               | CL      | SEEDS | RES                        | SM                 | RB                          | CBE                                   | 12.5                                              |
| 9  | <i>Certhia brachydactyla</i>         | CERBRA               | FOR     | INVER | RES                        | NM                 | RB                          | SBE                                   | 9                                                 |
| 10 | <i>Certhia familiaris</i>            | CERFAM               | FOR     | INVER | RES                        | NM                 | RB                          | SBE                                   | 8.3                                               |
| 11 | <i>Cettia cetti</i>                  | CETCET               | WET     | INVER | RES                        | NM                 | RB                          | SBE                                   | 4.5                                               |
| 12 | <i>Chloris chloris</i>               | CHLCHL               | FOR     | SEEDS | RES                        | SM                 | RB                          | CBE                                   | 12.5                                              |
| 13 | <i>Coccothraustes coccothraustes</i> | COCCOC               | FOR     | SEEDS | NOM                        | SM                 | RB                          | CBE                                   | 6                                                 |
| 14 | <i>Curruca communis</i>              | CURCOM               | CL      | INVER | PAS                        | LM                 | RB                          | CBE                                   | 4.5                                               |
| 15 | <i>Curruca curruca</i>               | CURCUR               | CL      | INVER | PAS                        | LM                 | RB                          | CBE                                   | 7.5                                               |
| 16 | <i>Curruca nisoria</i>               | CURNIS               | CL      | INVER | PAS                        | LM                 | RB                          | SBE                                   | 6.8                                               |
| 17 | <i>Cyanecula svecica</i>             | CYASVE               | WET     | INVER | PAS                        | LM                 | NB                          | SBE                                   | 8.3                                               |
| 18 | <i>Cyanistes caeruleus</i>           | CYACAE               | FOR     | INVER | NOM                        | SM                 | RB                          | CBE                                   | 15                                                |
| 19 | <i>Delichon urbicum</i>              | DELURB               | CL      | INVER | PAS                        | LM                 | RB                          | CBE                                   | 6                                                 |
| 20 | <i>Emberiza cia</i>                  | EMBCIA               | CL      | INVER | RES                        | SM                 | RB                          | SBE                                   | 10                                                |
| 21 | <i>Emberiza cirius</i>               | EMBCIR               | CL      | SEEDS | RES                        | SM                 | RB                          | SBE                                   | 8.8                                               |
| 22 | <i>Emberiza citrinella</i>           | EMBCIT               | CL      | SEEDS | RES                        | SM                 | RB                          | CBE                                   | 10                                                |
| 23 | <i>Emberiza schoeniclus</i>          | EMBSCH               | WET     | INVER | RES                        | SM                 | RB                          | CBE                                   | 9                                                 |
| 24 | <i>Erithacus rubecula</i>            | ERIRUB               | FOR     | INVER | RES                        | SM                 | RB                          | CBE                                   | 13.8                                              |
| 25 | <i>Ficedula hypoleuca</i>            | FICHYP               | FOR     | INVER | PAS                        | LM                 | RB                          | SBE                                   | 9.8                                               |
| 26 | <i>Fringilla coelebs</i>             | FRICOE               | FOR     | INVER | RES                        | SM                 | RB                          | CBE                                   | 6.8                                               |
| 27 | <i>Fringilla montifringilla</i>      | FRIMON               | FOR     | INVER | NOM                        | SM                 | OB                          | SBE                                   | 9                                                 |
| 28 | <i>Garrulus glandarius</i>           | GARGLA               | FOR     | INVER | NOM                        | SM                 | RB                          | CBE                                   | 9                                                 |
| 29 | <i>Hippolais icterina</i>            | HIPICT               | FOR     | INVER | PAS                        | LM                 | OB                          | CBE                                   | 6.8                                               |
| 30 | <i>Hippolais polyglotta</i>          | HIPPOL               | CL      | INVER | PAS                        | LM                 | OB                          | SBE                                   | 6.8                                               |
| 31 | <i>Hirundo rustica</i>               | HIRRUS               | CL      | INVER | PAS                        | LM                 | RB                          | CBE                                   | 9                                                 |
| 32 | <i>Lanius collurio</i>               | LANCOL               | CL      | INVER | PAS                        | LM                 | RB                          | CBE                                   | 5                                                 |

|    |                                |         |     |       |     |    |    |     |      |
|----|--------------------------------|---------|-----|-------|-----|----|----|-----|------|
| 33 | <i>Linaria cannabina</i>       | LINCAN  | CL  | SEEDS | RES | SM | RB | CBE | 7.5  |
| 34 | <i>Locustella fluviatilis</i>  | LOCFLU  | FOR | INVER | PAS | LM | RB | CBE | 7.5  |
| 35 | <i>Locustella luscinioides</i> | LOCLUS  | WET | INVER | PAS | LM | RB | CBE | 8    |
| 36 | <i>Locustella naevia</i>       | LOCNAE  | CL  | INVER | PAS | LM | RB | SBE | 8.3  |
| 37 | <i>Lophophanes cristatus</i>   | LOPCRI  | FOR | INVER | RES | NM | RB | CBE | 12   |
| 38 | <i>Loxia curvirostra</i>       | LOXCUR  | FOR | SEEDS | NOM | SM | RB | CBE | 3.5  |
| 39 | <i>Luscinia luscinia</i>       | LUSLUS  | CL  | INVER | PAS | LM | NB | SBE | 6.8  |
| 40 | <i>Luscinia megarhynchos</i>   | LUSMEG  | CL  | INVER | PAS | LM | RB | CBE | 6.8  |
| 41 | <i>Motacilla alba</i>          | MOTALB  | CL  | INVER | RES | SM | RB | CBE | 13.8 |
| 42 | <i>Motacilla cinerea</i>       | MOTCIN  | FOR | INVER | RES | SM | RB | SBE | 10   |
| 43 | <i>Motacilla flava</i>         | MOTFLA  | CL  | INVER | PAS | LM | RB | CBE | 7.5  |
| 44 | <i>Muscicapa striata</i>       | MUSSTR  | FOR | INVER | PAS | LM | RB | CBE | 6.8  |
| 45 | <i>Oriolus oriolus</i>         | ORIORI  | FOR | INVER | PAS | LM | RB | CBE | 6    |
| 46 | <i>Parus major</i>             | PARMAJ  | FOR | INVER | NOM | SM | RB | CBE | 12.8 |
| 47 | <i>Passer domesticus</i>       | PASDOM  | CL  | SEEDS | RES | NM | RB | CBE | 10.5 |
| 48 | <i>Passer italiae</i>          | PASITA  | CL  | SEEDS | RES | NM | RB | SBE | 12.5 |
| 49 | <i>Passer montanus</i>         | PASMON  | CL  | SEEDS | RES | SM | RB | CBE | 9    |
| 50 | <i>Periparus ater</i>          | PERATE  | FOR | INVER | NOM | SM | RB | CBE | 18   |
| 51 | <i>Phoenicurus ochruros</i>    | PHOOCH  | CL  | INVER | RES | SM | RB | CBE | 10   |
| 52 | <i>Phoenicurus phoenicurus</i> | PHOPHO  | FOR | INVER | PAS | LM | RB | CBE | 7.5  |
| 53 | <i>Phylloscopus collybita</i>  | PHYCOL  | FOR | INVER | PAS | LM | RB | CBE | 11   |
| 54 | <i>Phylloscopus sibilatrix</i> | PHYSIB  | FOR | INVER | PAS | LM | RB | CBE | 9    |
| 55 | <i>Phylloscopus trochilus</i>  | PHYTRO  | FOR | INVER | PAS | LM | RB | CBE | 9    |
| 56 | <i>Poecile montanus</i>        | POEMON  | FOR | INVER | RES | NM | RB | CBE | 7    |
| 57 | <i>Poecile palustris</i>       | POEPAL  | FOR | INVER | NOM | SM | RB | CBE | 7.5  |
| 58 | <i>Prunella modularis</i>      | PRUMOD  | FOR | INVER | RES | SM | RB | CBE | 11.3 |
| 59 | <i>Pyrrhula pyrrhula</i>       | PYRPYR  | FOR | SEEDS | NOM | SM | RB | CBE | 12.5 |
| 60 | <i>Regulus ignicapilla</i>     | REGIGN  | FOR | INVER | RES | SM | RB | CBE | 14.3 |
| 61 | <i>Regulus regulus</i>         | REGREG  | FOR | INVER | RES | SM | RB | CBE | 20   |
| 62 | <i>Remiz pendulinus</i>        | REMPEN  | WET | INVER | PAS | SM | RB | SBE | 9    |
| 63 | <i>Riparia riparia</i>         | RIPRIP  | WET | INVER | PAS | LM | RB | SBE | 6.8  |
| 64 | <i>Saxicola rubetra</i>        | SAXRUB  | CL  | INVER | PAS | LM | RB | CBE | 8.3  |
| 65 | <i>Saxicola rubicola</i>       | SAXRUBI | CL  | INVER | RES | SM | RB | CBE | 15   |
| 66 | <i>Serinus serinus</i>         | SERSER  | CL  | SEEDS | RES | SM | RB | CBE | 8.8  |
| 67 | <i>Sitta europaea</i>          | SITEUR  | FOR | INVER | RES | NM | RB | CBE | 10.5 |
| 68 | <i>Spinus spinus</i>           | SPISPI  | FOR | SEEDS | NOM | SM | RB | SBE | 6    |
| 69 | <i>Sturnus vulgaris</i>        | STUVUL  | CL  | INVER | RES | SM | RB | CBE | 7.5  |
| 70 | <i>Sylvia atricapilla</i>      | SYLATR  | FOR | INVER | PAS | SM | RB | CBE | 6.8  |

|    |                                |        |     |       |     |    |    |     |     |
|----|--------------------------------|--------|-----|-------|-----|----|----|-----|-----|
| 71 | <i>Sylvia borin</i>            | SYLBOR | CL  | INVER | PAS | LM | RB | CBE | 6.8 |
| 72 | <i>Troglodytes troglodytes</i> | TROTRO | FOR | INVER | RES | SM | RB | CBE | 12  |
| 73 | <i>Turdus merula</i>           | TURMER | FOR | INVER | RES | SM | RB | CBE | 12  |
| 74 | <i>Turdus philomelos</i>       | TURPHI | FOR | INVER | RES | SM | RB | CBE | 10  |

**Table S3.** Percentages of recoveries by countries in geographic group after spatial clustering.

| States in an individual geographical cluster | Percentages of recoveries of individual country in geographic group (%) |
|----------------------------------------------|-------------------------------------------------------------------------|
| <b>NE</b>                                    |                                                                         |
| Austria                                      | 9.6                                                                     |
| Czech Republic                               | 26.4                                                                    |
| Hungary                                      | 32.0                                                                    |
| Poland                                       | 22.4                                                                    |
| Slovakia                                     | 9.6                                                                     |
| <b>NW</b>                                    |                                                                         |
| Austria                                      | 2.7                                                                     |
| Belgium                                      | 25.5                                                                    |
| Czech Republic                               | 3.4                                                                     |
| Germany                                      | 37.6                                                                    |
| Great Britain                                | 0.7                                                                     |
| Nederland                                    | 26.8                                                                    |
| Poland                                       | 1.3                                                                     |
| Switzerland                                  | 2.0                                                                     |
| <b>NN</b>                                    |                                                                         |
| Denmark                                      | 11.9                                                                    |
| Germany                                      | 9.5                                                                     |
| Latvia                                       | 1.2                                                                     |
| Lithuania                                    | 3.6                                                                     |
| Norway                                       | 11.9                                                                    |
| Poland                                       | 6.0                                                                     |
| Russia                                       | 10.7                                                                    |
| Sweden                                       | 45.2                                                                    |
| <b>NNE</b>                                   |                                                                         |
| Belarus                                      | 3.7                                                                     |
| Estonia                                      | 7.4                                                                     |
| Finland                                      | 61.1                                                                    |
| Latvia                                       | 7.4                                                                     |
| Lithuania                                    | 3.7                                                                     |
| Poland                                       | 3.7                                                                     |
| Russia                                       | 9.3                                                                     |
| Sweden                                       | 3.7                                                                     |

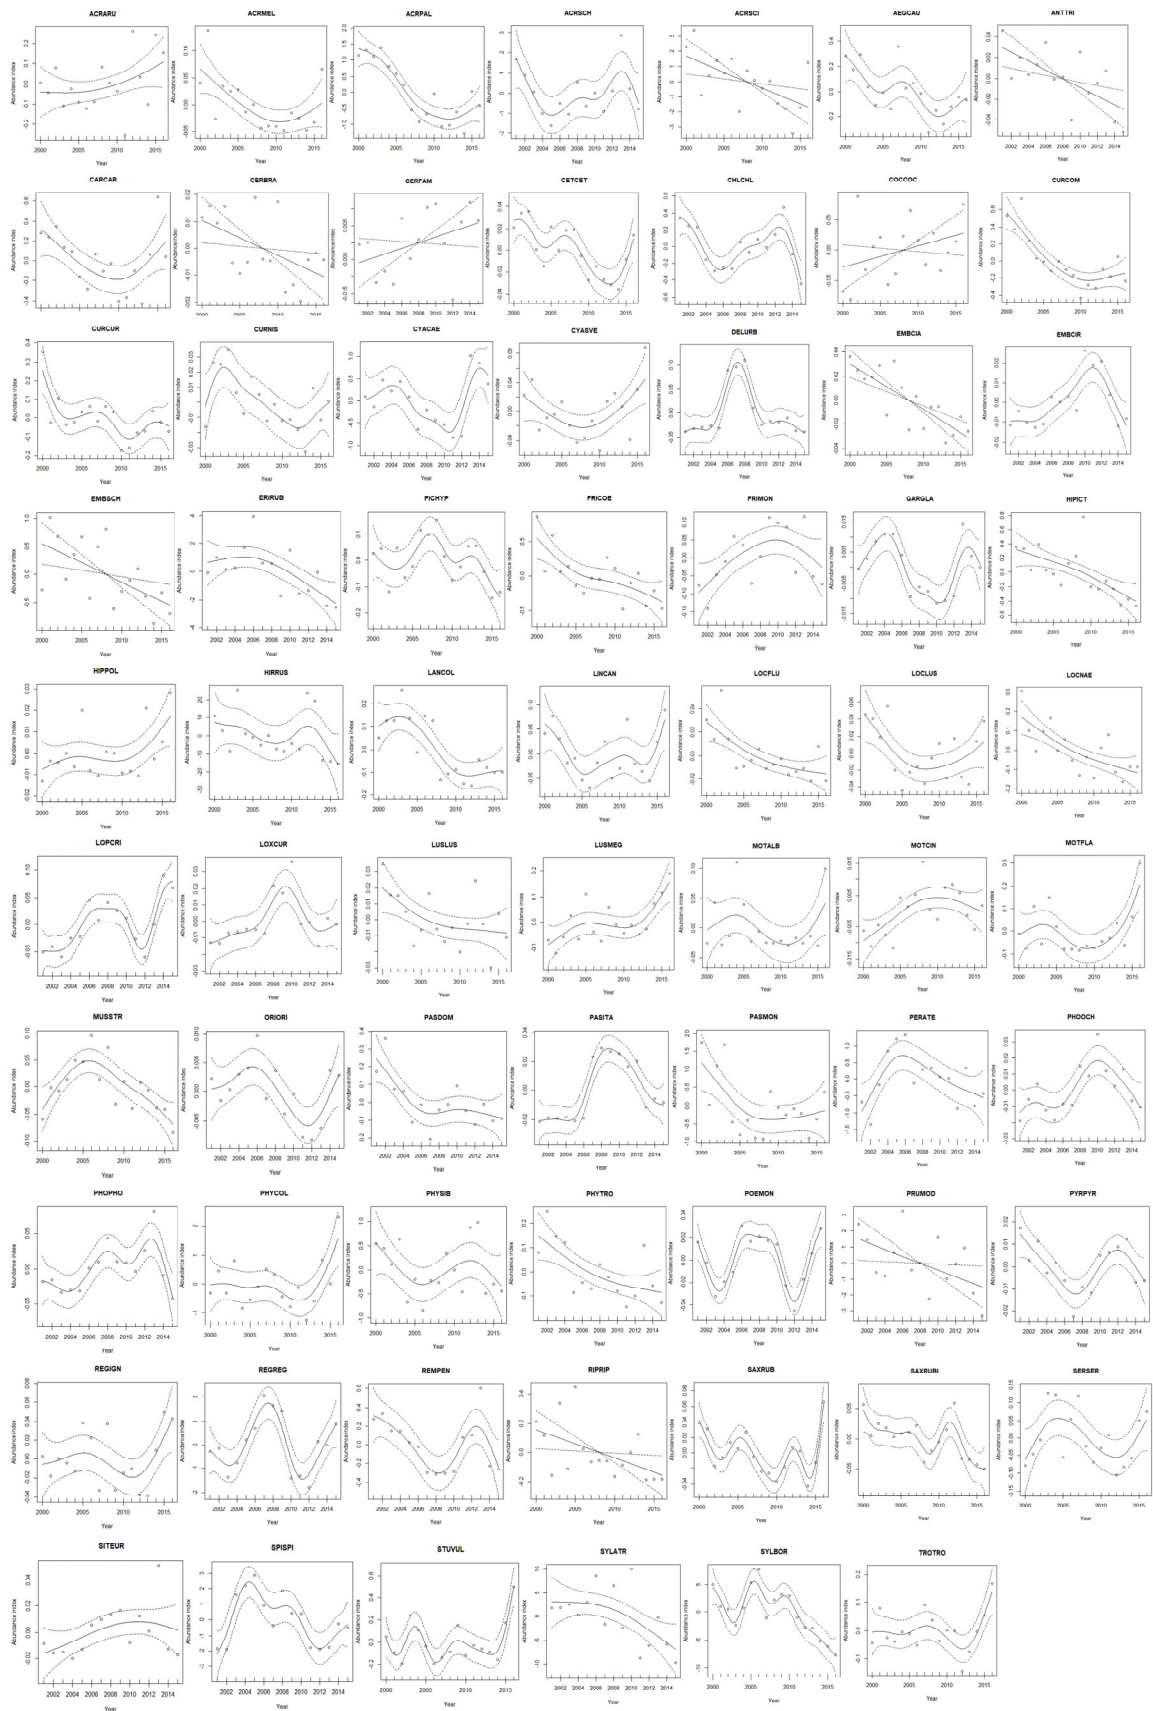

**Figure S1.** Models of population dynamics of studied passerine species on autumn migration in Slovenia according to long-term ringing data.

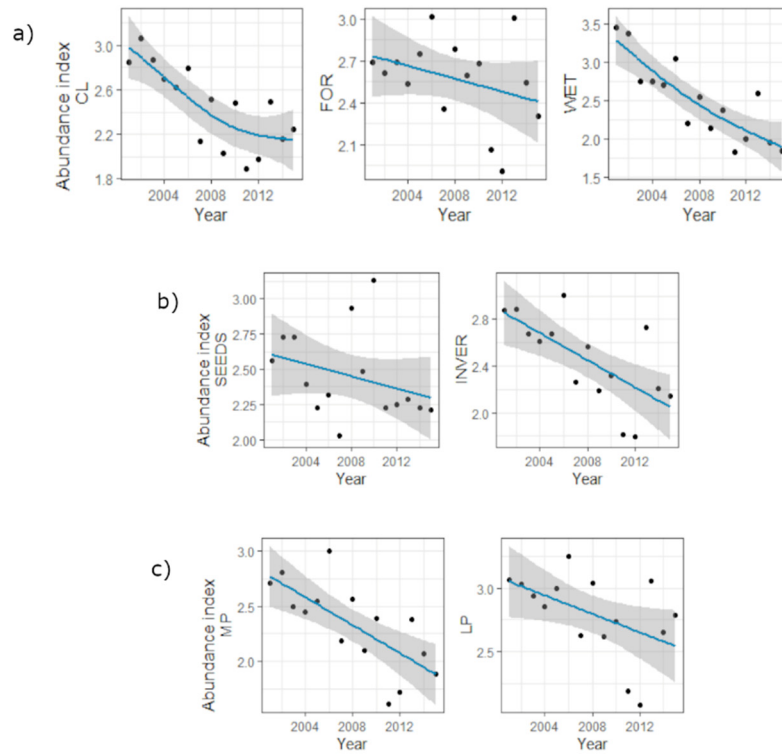

**Figure S2.** Modelling of population dynamics and trends for particular species guilds according to ecological traits: a) habitat traits, b) diet traits, and life-history traits: c) productivity for the period 2000–2016. See Table 1 for abbreviations.

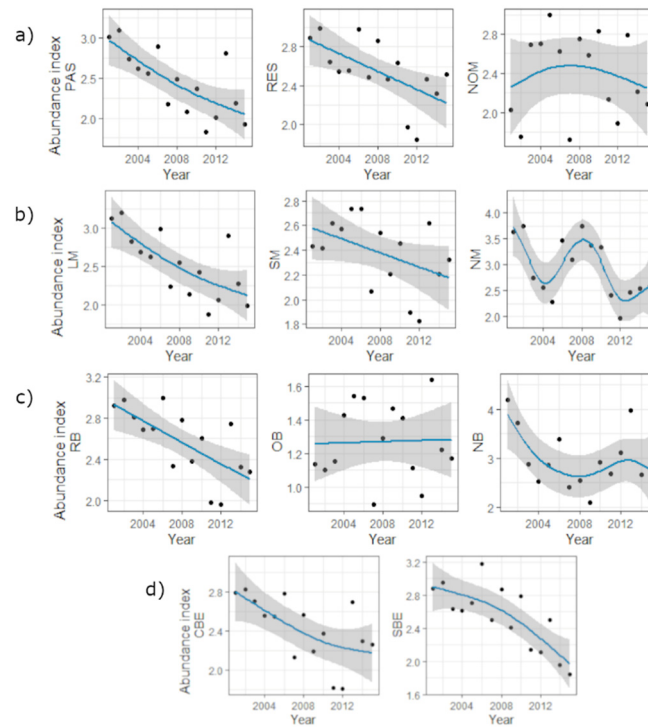

**Figure S3.** Modelling of population dynamics and trends for particular species guilds according to: a), b) migratory behaviour, and c), d) species occurrence in breeding season in Europe and Slovenia for the period 2000–2016. The model for OB (occasional breeders) is not significant with explained deviance < 10%. See Table 1 for abbreviations.



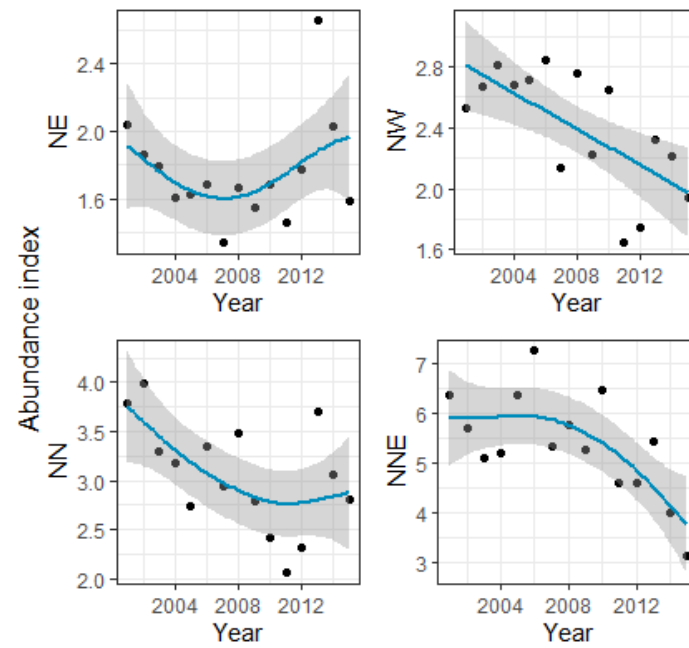

**Figure S4.** Modelling of population dynamics and trends for particular species guilds according to breeding origin (clusters of recoveries) for the period 2000–2016. See Table 1 for abbreviations.
